# Supplementary material for: Will Fly Repellency Using Deltamethrin Reduce Intramammary Infections, Stress and Fatigue Indicators of Dairy Ewes under Intensive Management?
Source: MDPI journal article supplement (doi:10.3390/pathogens10020232), 2021-02-19
Supplement: s1 [file s1]

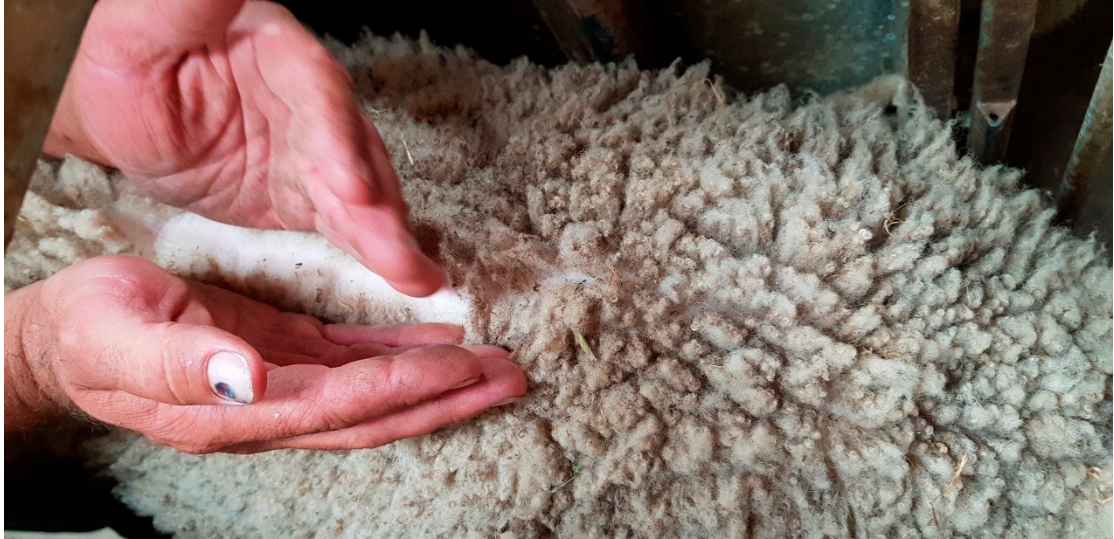

**Figure S1.** Separation of the wool of the ewe before the application of deltamethrin (Deltanil®, Virbac).

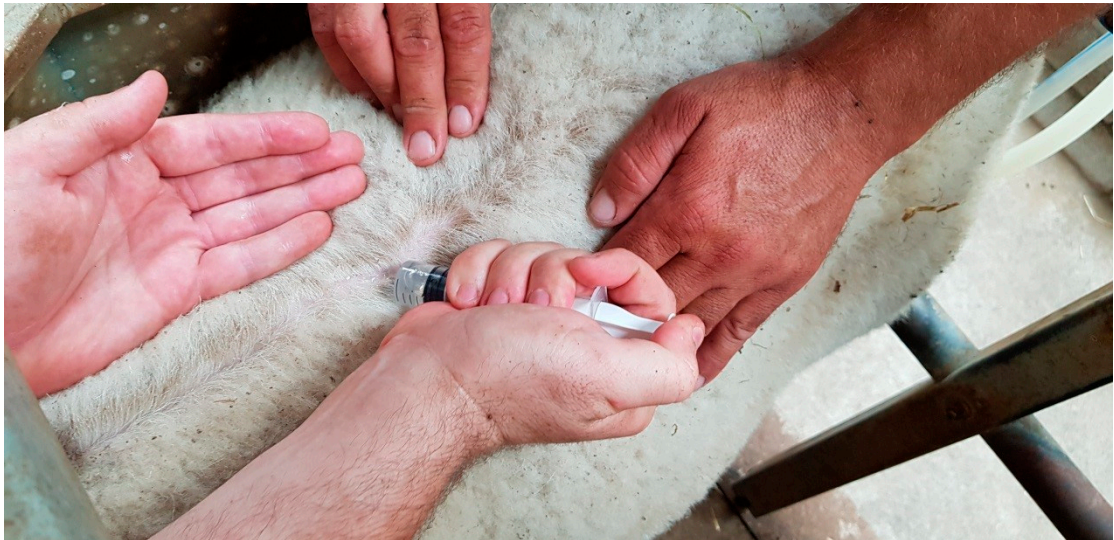

**Figure S2.** Application of deltamethrin (Deltanil®, Virbac).

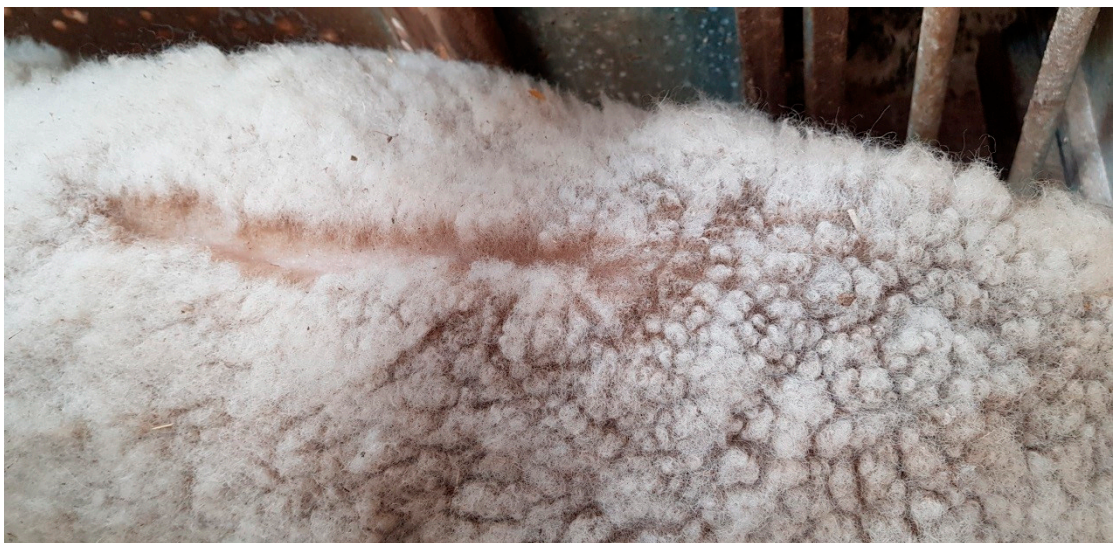

**Figure S3.** The area of deltamethrin (Deltanil®, Virbac) application post-treatment.
